# Supplementary material for: Epidemiology of dengue and other arboviruses in a cohort of school children and their families in Yucatan, Mexico: Baseline and first year follow-up
Source: PubMed Central journal article supplement (PMC6248893; doi:10.1371/journal.pntd.0006847), 2018-11-21
Supplement: pntd.0006847.s002.pdf [file pntd.0006847.s002.pdf]

# Supplemental material

September 27, 2018

**Epidemiology of Dengue and Other Arboviruses in a Cohort of School Children and Their Families in Yucatan, Mexico: Baseline and First Year Follow-up.**

## Table 1

Table 1: **Incidence rate ratios by city for all arbovirus infections in the first annual follow-up of the cohort in Yucatan, Mexico.**

| Event                       | IRR (95%CI)          |
|-----------------------------|----------------------|
| <b>Merida</b>               |                      |
| Dengue confirmed cases      | 1.99 (1.10, 3.59)    |
| Dengue total infections     | 22.9 (12.71, 41.31)  |
| Chikungunya confirmed cases | 0.24 (0.13, 0.43)    |
| Zika confirmed cases        | 0                    |
| Any arboviral infections    | 4.88 (2.71, 8.81)    |
| <b>Progreso</b>             |                      |
| Dengue confirmed cases      | 0                    |
| Dengue total infections     | 17.93 (9.94, 32.32)  |
| Chikungunya confirmed cases | 2.15 (1.19, 3.88)    |
| Zika confirmed cases        | 0                    |
| Any arboviral infections    | 10.76 (5.96, 19.39)  |
| <b>Ticul</b>                |                      |
| Dengue confirmed cases      | 2.36 (1.30, 4.26)    |
| Dengue total infections     | 21.26 (11.79, 38.33) |
| Chikungunya confirmed cases | 0.79 (0.44, 1.42)    |
| Zika confirmed cases        | 0.62 (0.35, 1.12)    |
| Any arboviral infections    | 4.32 (2.40, 7.81)    |
