# Supplementary material for: Epidemiology of dengue and other arboviruses in a cohort of school children and their families in Yucatan, Mexico: Baseline and first year follow-up
Source: PubMed Central journal article supplement (PMC6248893; doi:10.1371/journal.pntd.0006847), 2018-11-21
Supplement: pntd.0006847.s003.pdf [file pntd.0006847.s003.pdf]

# Supplemental tables

September 27, 2018

**Epidemiology of Dengue and Other Arboviruses in a Cohort of School Children and Their Families in Yucatan, Mexico: Baseline and First Year Follow-up.**

## Table 2

Table 1: Incidence rate ratios by age for all arbovirus infections in the first annual follow-up of the cohort in Yucatan, Mexico.

| Event                       | IRR (95%CI)           |
|-----------------------------|-----------------------|
| <b>≤ 8 year olds</b>        |                       |
| Dengue confirmed cases      | 2.44 (0.82, 7.29)     |
| Dengue total infections     | 27.70 (15.36, 49.94)  |
| Chikungunya confirmed cases | 0.31 (0.12, 0.73)     |
| Zika confirmed cases        | 4.07 (1.15, 14.43)    |
| Any arboviral infections    | 3.42 (1.90, 6.17)     |
| <b>9 -14 year olds</b>      |                       |
| Dengue confirmed cases      | 0                     |
| Dengue total infections     | 23.35 (12.95, 42.11)  |
| Chikungunya confirmed cases | 1.37 (0.57, 3.31)     |
| Zika confirmed cases        | 1.37 (0.38, 4.87)     |
| Any arboviral infections    | 9.16 (5.08, 16.51)    |
| <b>15-19 year olds</b>      |                       |
| Dengue confirmed cases      | 0                     |
| Dengue total infections     | 18.85 (10.45, 34.01)  |
| Chikungunya confirmed cases | 0                     |
| Zika confirmed cases        | 0                     |
| Any arboviral infections    | 9.43 (5.23, 17.02)    |
| <b>20-49 year olds</b>      |                       |
| Dengue confirmed cases      | 0                     |
| Dengue total infections     | 23.85 (13.22, 43.00)  |
| Chikungunya confirmed cases | 0.75 (0.31, 1.79)     |
| Zika confirmed cases        | 0                     |
| Any arboviral infections    | 7.71 (3.20, 18.57)    |
| <b>≥ 50 year olds</b>       |                       |
| Dengue confirmed cases      | 0                     |
| Dengue total infections     | 49.46 (27.43, 89.19)  |
| Chikungunya confirmed cases | 0                     |
| Zika confirmed cases        | 0                     |
| Any arboviral infections    | 98.93 (54.86, 178.38) |
